# Supplementary material for: Electrical detection of ppb region NO2 using Mg-porphyrin-modified graphene field-effect transistors
Source: Royal Society of Chemistry journal article supplement (doi:10.1039/d1na00519g), 2021-01-01
Supplement: d1na00519g1.pdf [file d1na00519g1.pdf]

Supporting Information

**Electrical Detection of ppb Region NO<sub>2</sub> using Mg-porphyrin-modified Graphene Field-effect Transistors**

Takashi Ikuta, Takashi Tamaki, Hiroshi Masai, Ryudai Nakanishi, Kitaro Endo, Jun Terao, Kenzo Maehashi

Table of Contents

Experimental Details

Figure S1: <sup>1</sup>H NMR spectrum (500 MHz, CDCl<sub>3</sub>, r.t.) of Mg-porphyrin

Figure S2: <sup>13</sup>C NMR spectrum (126 MHz, CDCl<sub>3</sub>, r.t.) of Mg-porphyrin.

Figure S3: (top) Experimental and (bottom) calculated ESI-MS spectrum of Mg-porphyrin

Figure S4: AFM images before and after metalloporphyrin-modification on graphene.

Figure S5: Raman spectra of pristine and metalloporphyrin-modified graphene.

Figure S6: Langmuir plots of Dirac point shift with NO<sub>2</sub> concentration in the range from 0.1 to 5 ppb.

Figure S7: (left) Transfer characteristics of the Mg-porphyrin-modified graphene FET when air was induced. (right) Time dependence of Dirac point voltage shift in ambient air.

Figure S8: Transfer characteristics before and after NO<sub>2</sub> detection.

## Experimental Details

### General remarks

Unless otherwise stated, commercially available chemicals were used as received. CH<sub>2</sub>Cl<sub>2</sub> was purchased from Kanto Chemical and further purified by passage through activated alumina under positive argon or nitrogen pressure.<sup>1</sup> Electrospray ionization (ESI) mass spectra were obtained on a BRUKER micrOTOFII-KEO2 System. <sup>1</sup>H NMR (500 MHz) and <sup>13</sup>C {<sup>1</sup>H}NMR (126 MHz) were measured with a Bruker AVANCE-500 spectrometer. The <sup>1</sup>H NMR chemical shifts are reported relative to residual protonated solvents (7.26 ppm) in CDCl<sub>3</sub>. The <sup>13</sup>C NMR chemical shifts are reported relative to <sup>13</sup>CDCl<sub>3</sub> (77.16 ppm).

### Spectrum data of Mg-porphyrin

ESI-TOF MS (*m/z*): [Mg-porphyrin]<sup>+</sup> Calcd for C<sub>36</sub>H<sub>44</sub>MgN<sub>4</sub> 556.3; Found 556.2

<sup>1</sup>H NMR (500 MHz, CDCl<sub>3</sub>, r.t.): δ<sub>H</sub>= 10.12 (s, 4H, *meso*-H), 4.13 (q, *J* = 7.7 Hz, 16H, CH<sub>2</sub>), 1.95 (t, *J* = 7.7 Hz, 24H, CH<sub>3</sub>)

<sup>13</sup>C NMR (126 MHz, CDCl<sub>3</sub>, r.t.): δ<sub>C</sub>= 147.32, 142.25, 97.89, 20.12, 18.97

### Reference

- 1) Pangborn, A. B.; Giardello, M. A.; Grubbs, R. H.; Rosen, R. K.; Timmers, F. J. *Organometallics* **1996**, *15*, 1518-1520.

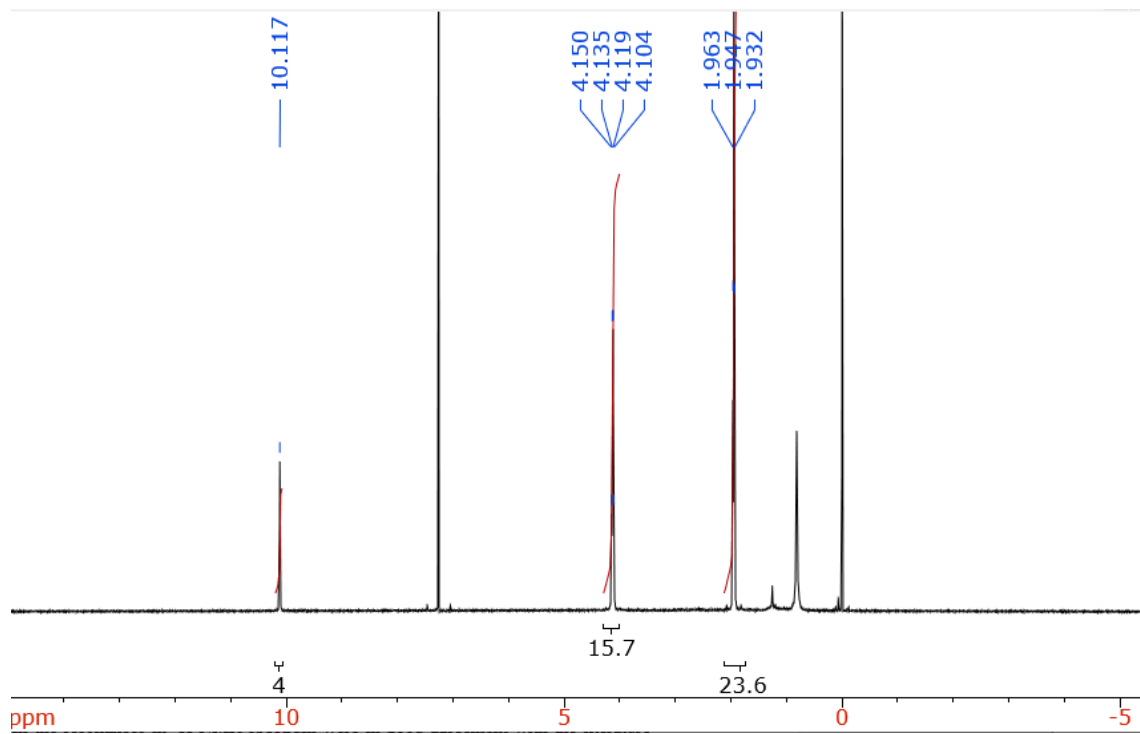

Figure S1:  $^1\text{H}$  NMR spectrum (500 MHz,  $\text{CDCl}_3$ , r.t.) of Mg-porphyrin.

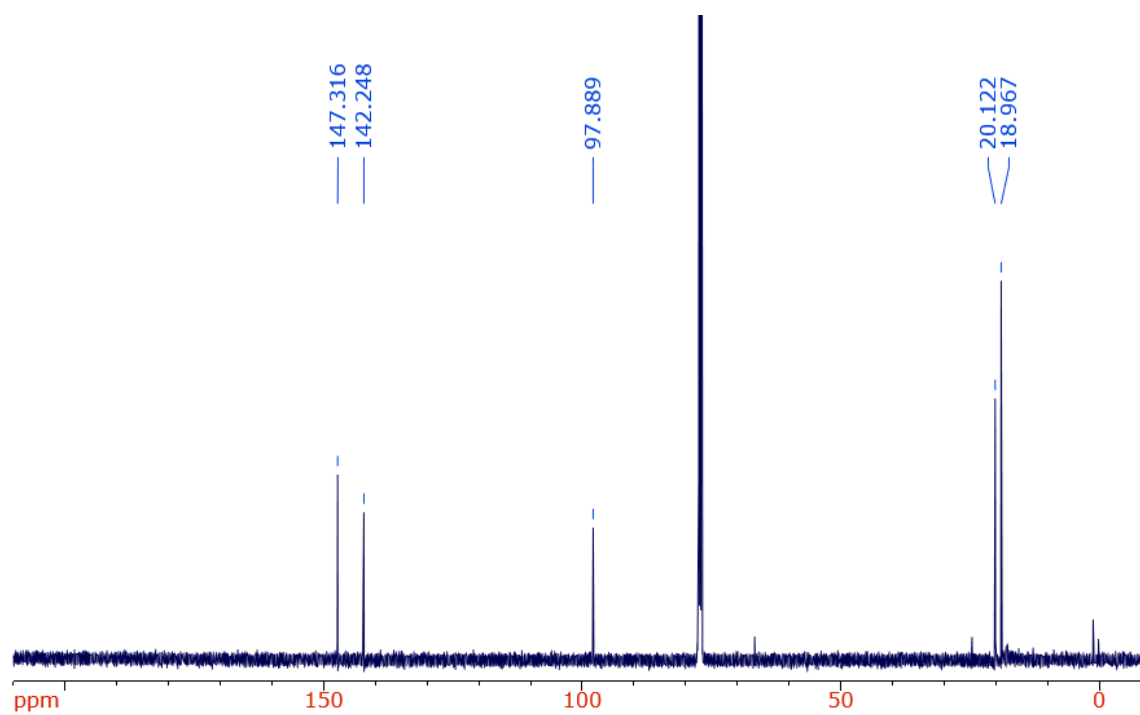

Figure S2:  $^{13}\text{C}$  NMR spectrum (126 MHz,  $\text{CDCl}_3$ , r.t.) of Mg-porphyrin.

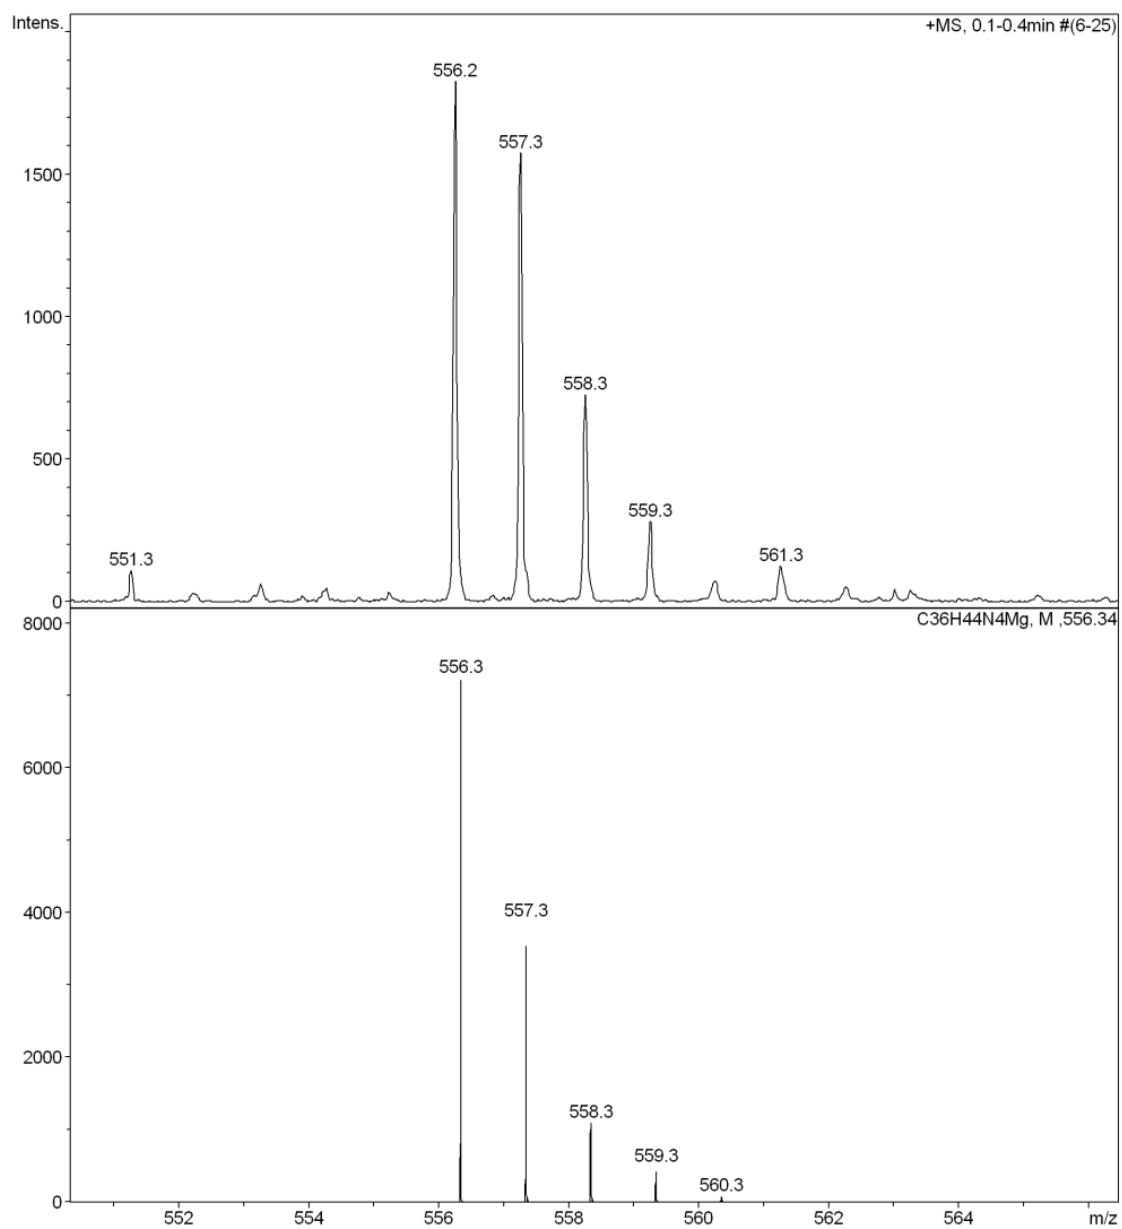

Figure S3: (top) Experimental and (bottom) calculated ESI-MS spectrum of Mg-porphyrin.

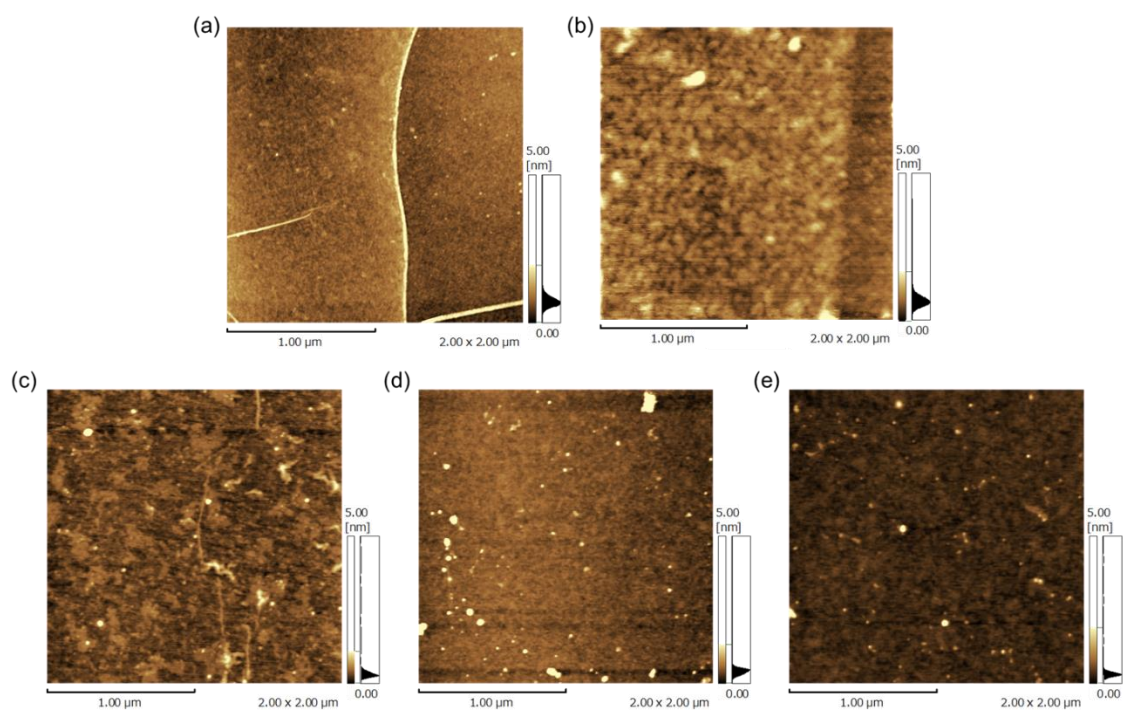

Figure S4: AFM images of (a) pristine, (b) Mg-porphyrin-modified, (c) Co-porphyrin-modified, (d) Ni-porphyrin-modified, and (e) Cu-porphyrin-modified graphene. The root mean square roughness in each case is 0.250, 0.378, 0.637, 0.513, and 0.352, respectively.

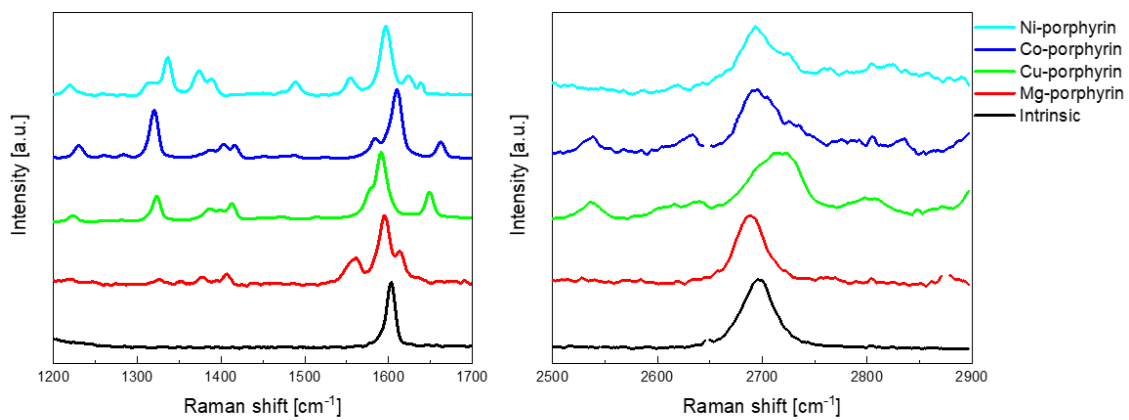

Figure S5: Raman spectra of pristine and metalloporphyrin-modified graphene. (left) 1200~1700  $\text{cm}^{-1}$  and (right) 2500~2900  $\text{cm}^{-1}$ . Each spectrum is normalized by a maximum value.

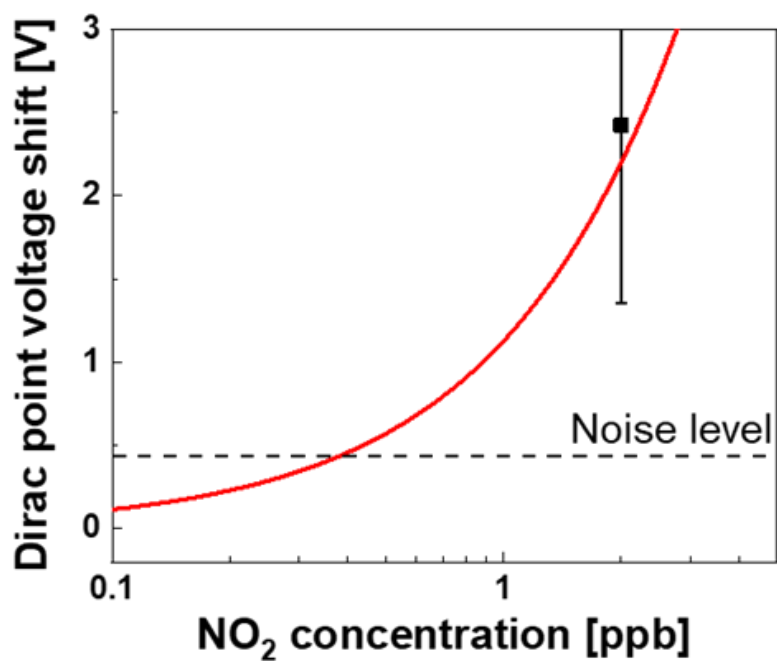

Figure S6: NO<sub>2</sub> concentration dependence of the Dirac-point voltage shift in the Mg-porphyrin-modified graphene FETs. The noise level (S/N = 3) was calculated to be ~430 mV from standard deviation of measurement at 0 ppb.

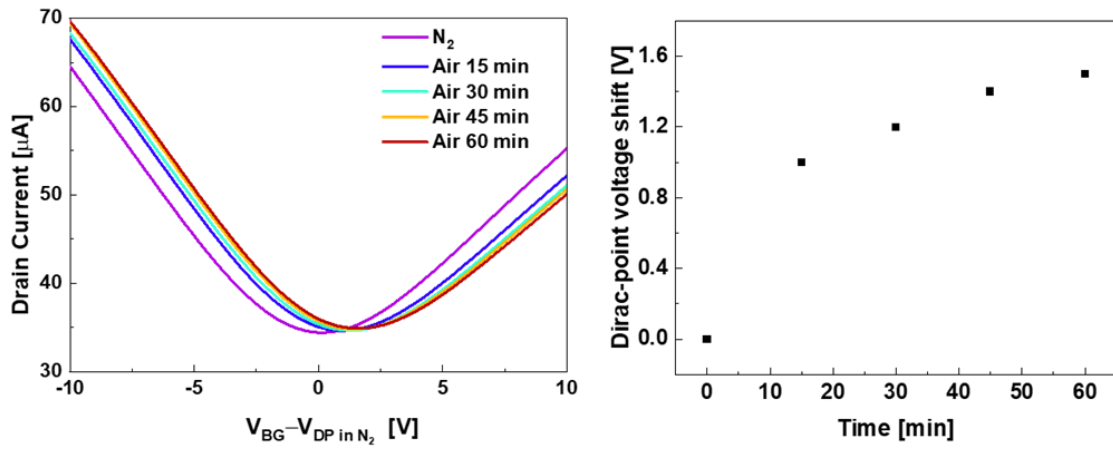

Figure S7: (left) Transfer characteristics of the Mg-porphyrin-modified graphene FET when air was induced. The transfer characteristics were measured by applying drain voltage of 50 mV with sweeping back-gate voltage. (right) Time dependence of the Dirac point voltage shift in ambient air.



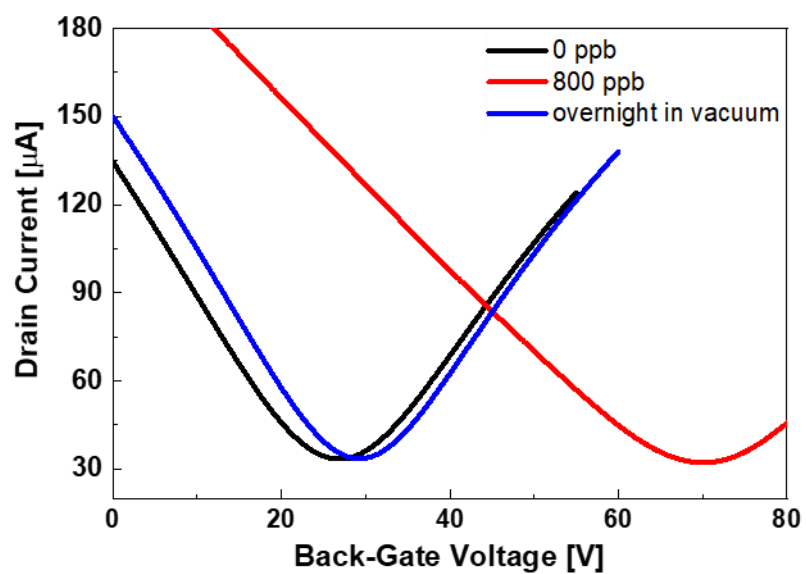

Figure S8: Transfer characteristics of the Mg-porphyrin-modified graphene FET when induced  $\text{NO}_2$  concentration are (black) 0 ppb, (red)  $\text{NO}_2$  800 ppb, and (blue) 0 ppb after overnight in vacuum.
